# Supplementary material
Source: publisher figshare collection journal article supplement (https://tandf.figshare.com/ndownloader/files/16609925)
Supplement: Supplementary file 1 [file 16609925]

**TIA Interview Schedule**

TIA story

- Tell me a little bit about what happened when you had your TIA/mini-stroke.

Aetiology of TIA

What do you think caused your TIA/mini-stroke?

Stroke knowledge, risk factors and behaviour change

- In your own words, what is the difference between a TIA/mini-stroke and a stroke?
- Do you know the risk factors for having another TIA or stroke?
- Were you given any advice on how to reduce your risk of having another TIA/mini-stroke or stroke in the future?
- What have you done since your TIA/mini-stroke to reduce your risk of having another TIA/mini-stroke or stroke?
- Do you think your risk of stroke has changed? How do you manage this risk?

(Ie. do you have regular check-ups with your GP or neurologist?)

TIA Management

- Can you suggest any changes to the healthcare you received after TIA which could be more helpful for future TIA patients?
- How soon after your TIA do you think you would have been able to absorb new information and advice?

Program specific questioning

- What ways do you think would be effective to give TIA patients information about
- Do you have a computer or laptop with a webcam at home, or own a smartphone or tablet computer (ie. iPad)?
- Would you have been willing to attend a twice a week program for 6 weeks to learn about stroke risks and ways to change your lifestyle to help reduce your risk?
- Is there anything in-particular you would have wished to have been told more about or shown how to do?
- Do you go to the gym regularly or have you in the past?

Closing

- Is there anything else you would like to tell us about your experience of having and recovering from a TIA?

***Thank you for sharing your experience of TIA and ideas with me and our research team***
